# Supplementary material
Source: Springer Nature journal article supplement (https://www.springermedizin.de/resource/supplementary/13063_2013_1937_MOESM3_ESM.pdf/9622002)

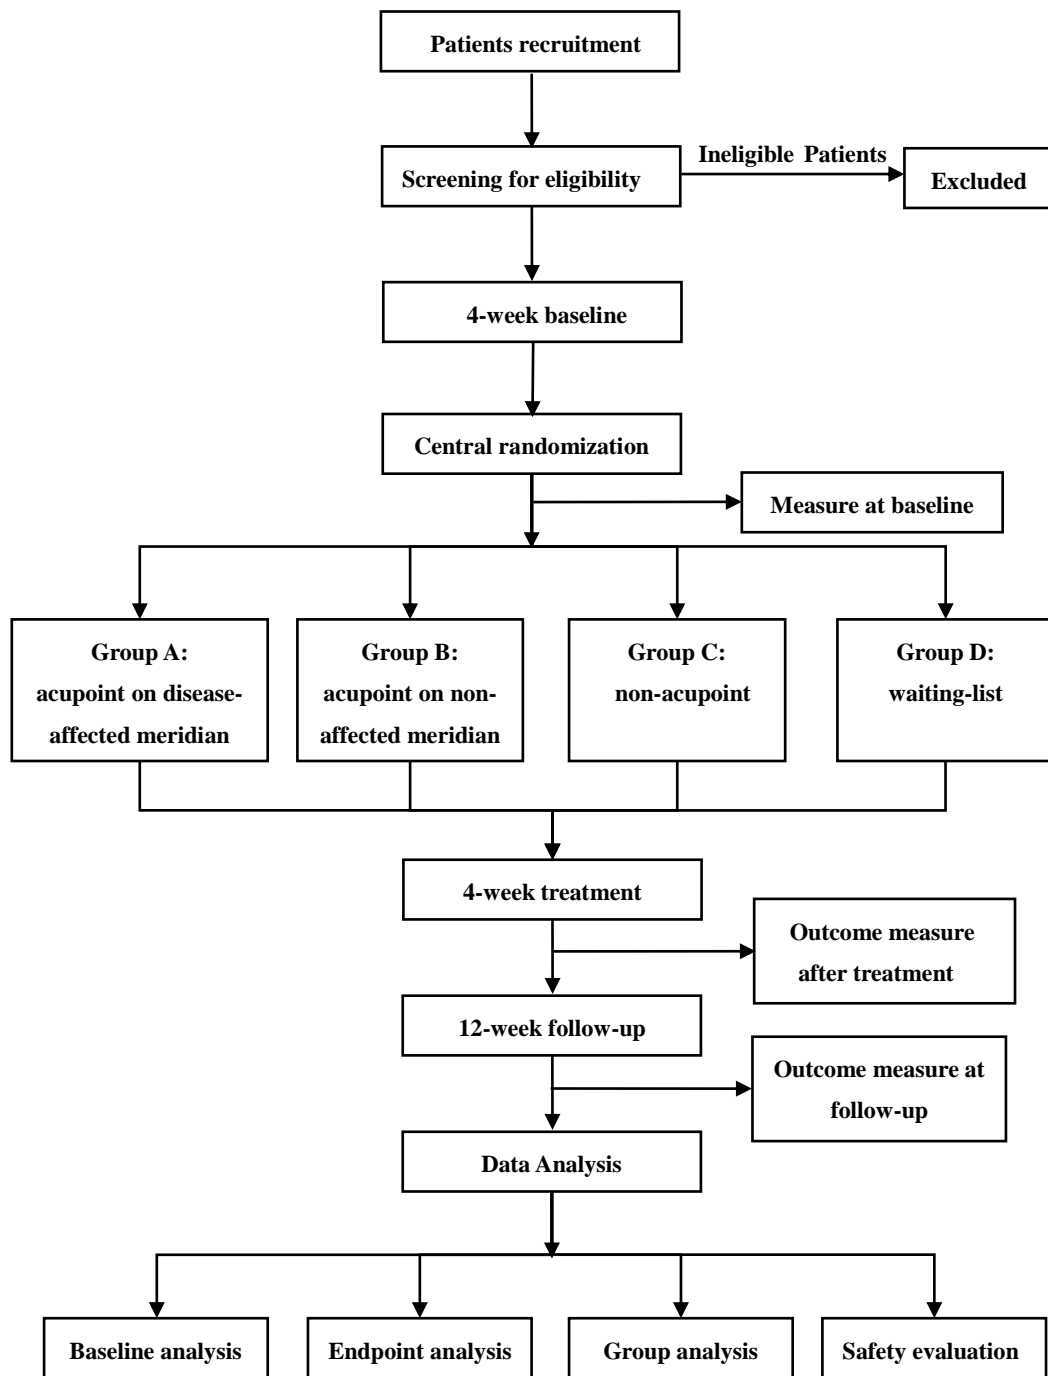

Figure 1 Trial flow chart

Supplement: MOESM3 [file 9622002]
